# Supplementary material for: Galactoside-Based Molecule Enhanced Antimicrobial Activity through Acyl Moiety Incorporation: Synthesis and In Silico Exploration for Therapeutic Target
Source: MDPI journal article supplement (doi:10.3390/ph16070998), 2023-07-13
Supplement: s1 [file s1]

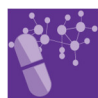

Supplementary Material

# Galactoside-Based Molecule Enhanced Antimicrobial Activity through Acyl Moiety Incorporation: Synthesis and *In Silico* Exploration for Therapeutic Target

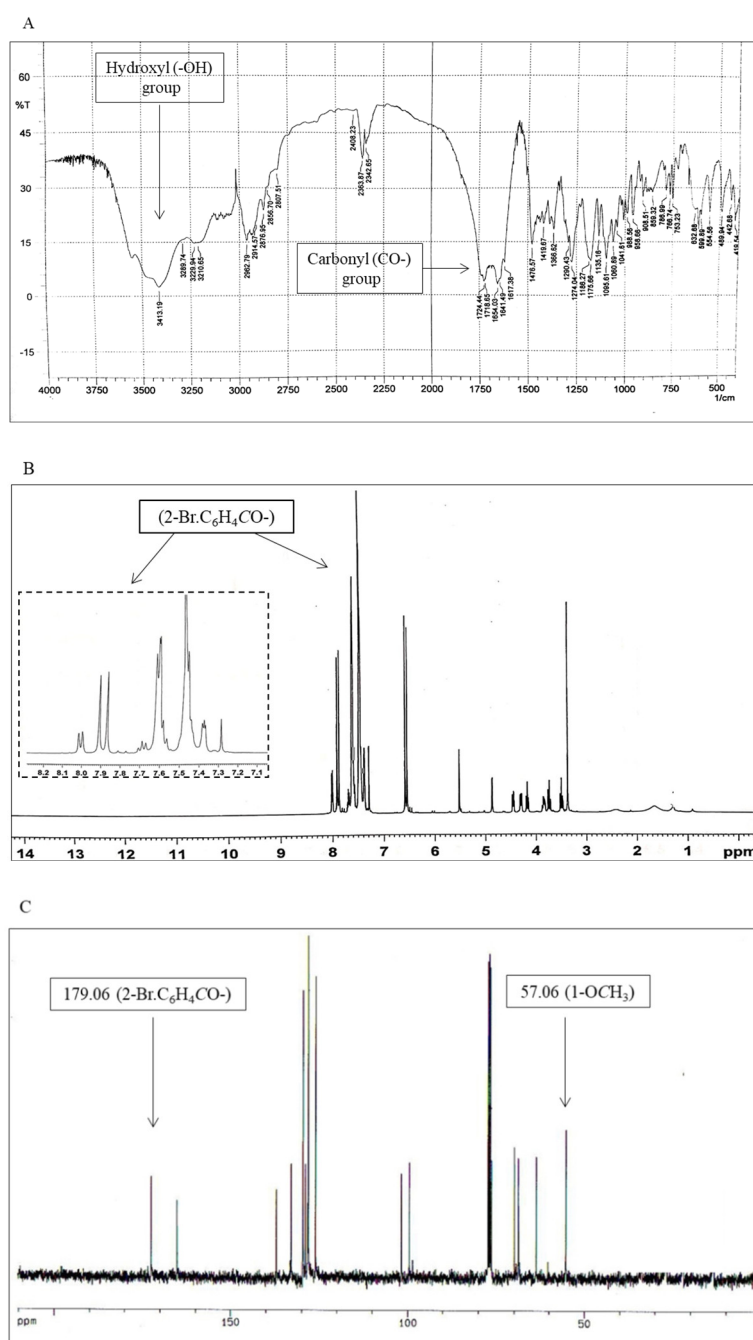

Figure S1. (A) FTIR, (B)  $^1\text{H}$  NMR and (B)  $^{13}\text{C}$  NMR spectra of the methyl 6-O-(2-bromobenzoyl)-β-D-galactopyranoside (2).

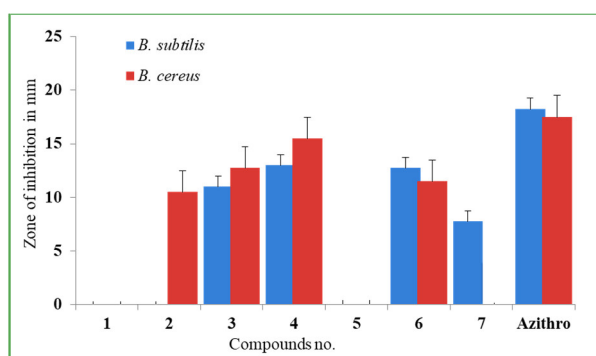

Figure S2. Zone of inhibition observed against gram-positive bacteria by compounds 2-7.

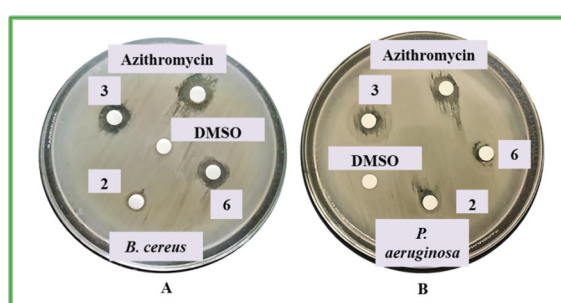

Figure S3. Experimental dishes of the synthesized test compounds 2, 3 and 6 against (A); *B. cereus* and (B); *P. aeruginosa*, Here DMSO = Negative control and Azithromycin = Positive control.

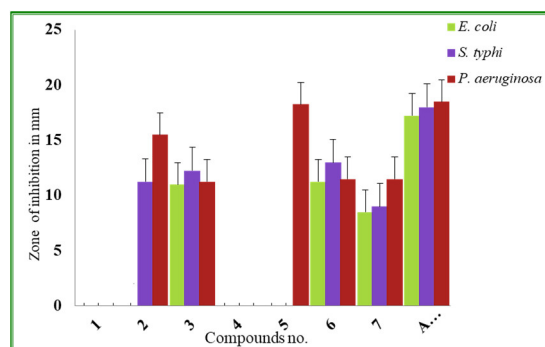

Figure S4. Zone of inhibition observed against gram-negative bacteria by compounds 2-7.

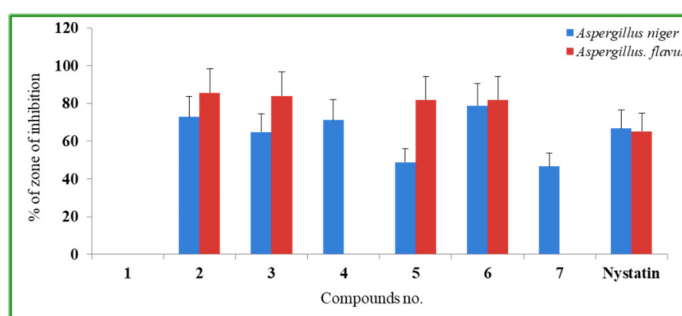

Figure S5. Antifungal activities of the synthesized compounds 2-7.

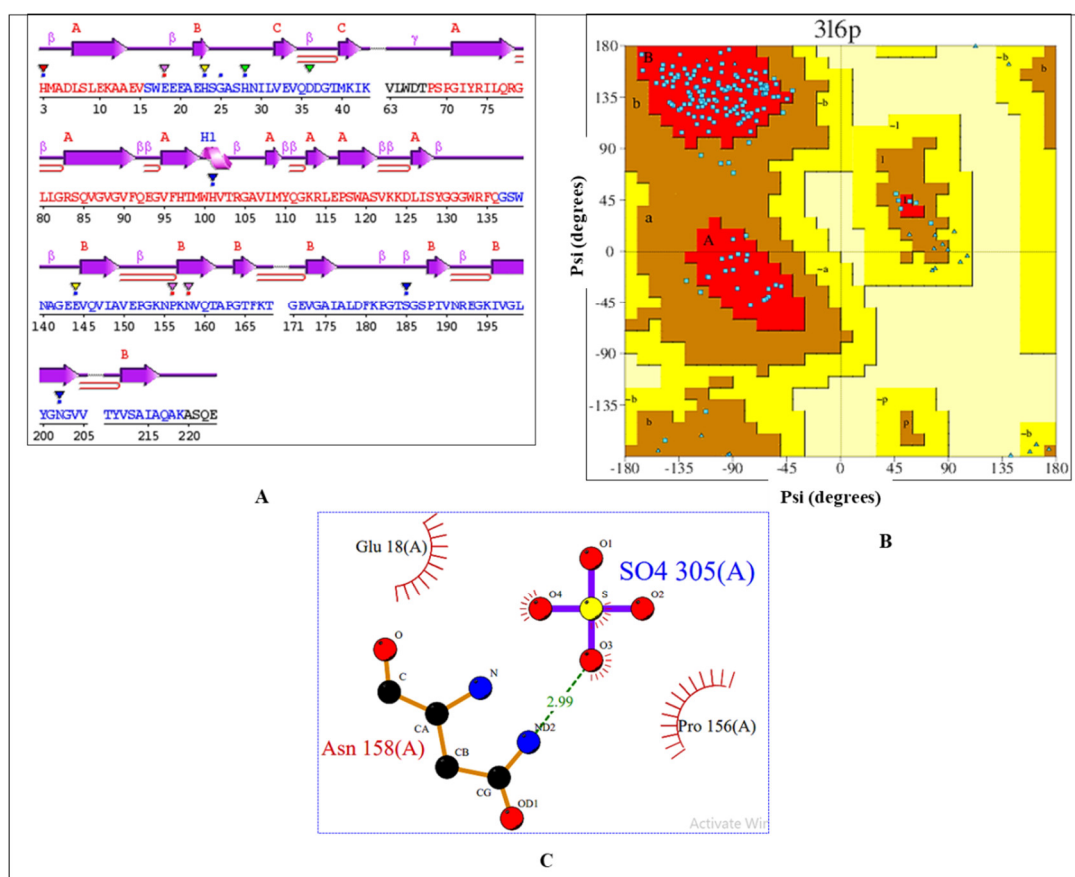

**Figure S6.** (A): Multiple sequence alignment of closest homologs of dengue virus 1 NS2B/NS3 protease (pdb: 3L6P); (B): Ligplot and (C): Ramachandran plot of dengue virus 1 NS2B/NS3 protease (pdb: 3L6P).

**Table S1.** The MIC and MBC values in mg/mL of compounds **2** and **3** against tested organisms.

| Name of bacteria                  | MIC (mg/mL) |            | MBC (mg/mL) |            |
|-----------------------------------|-------------|------------|-------------|------------|
|                                   | Compound 3  | Compound 6 | Compound 3  | Compound 6 |
| <i>B. subtilis</i> (ATCC 6633)    | 8.00        | 0.50       | 16.00       | 16.00      |
| <i>B. cereus</i> (BTCC 19)        | 8.00        | 2.00       | 8.00        | 8.00       |
| <i>E. coli</i> (ATCC 8739)        | 2.00        | 1.00       | 16.00       | 8.00       |
| <i>S.typh</i> (AE 14612) <i>i</i> | 0.125       | 2.00       | 8.00        | 8.00       |
| <i>P. aeruginosa</i> (ATCC 9027)  | 0.25        | 8.00       | 16.00       | 16.00      |

**Table S2.** Molecular formula, molecular weight, electronic energy (*E*), enthalpy (*H*), Gibb's free energy (*G*) in Hartree and dipole moment (*p*, Debye) of (MDGP, **1**) compounds.

| Entry    | MF                                                                | MW     | <i>E</i>  | <i>H</i>  | <i>G</i>  | <i>p</i> |
|----------|-------------------------------------------------------------------|--------|-----------|-----------|-----------|----------|
| <b>1</b> | C <sub>7</sub> H <sub>14</sub> O <sub>6</sub>                     | 194.18 | -722.2093 | -722.2084 | -722.2608 | 4.771    |
| <b>2</b> | C <sub>14</sub> H <sub>17</sub> O <sub>7</sub> Br                 | 377.14 | -3625.844 | -3625.843 | -3625.919 | 5.425    |
| <b>3</b> | C <sub>50</sub> H <sub>83</sub> O <sub>10</sub> Br                | 923.93 | -5253.279 | -5253.278 | -5253.479 | 5.162    |
| <b>4</b> | C <sub>56</sub> H <sub>95</sub> O <sub>10</sub> Br                | 1008.8 | -5862.524 | -5862.523 | -5862.671 | 5.023    |
| <b>5</b> | C <sub>35</sub> H <sub>26</sub> O <sub>10</sub> BrCl <sub>3</sub> | 792.65 | -6025.296 | -6025.295 | -6025.426 | 2.980    |
| <b>6</b> | C <sub>35</sub> H <sub>26</sub> O <sub>10</sub> BrCl <sub>3</sub> | 792.65 | -6025.289 | -6025.288 | -6025.419 | 8.200    |
| <b>7</b> | C <sub>47</sub> H <sub>53</sub> O <sub>10</sub> Br                | 857.66 | -5121.303 | -5121.302 | -5121.462 | 3.463    |

**Table S3.** Prediction of *in silico* of metabolism of (MDGP, 1) compounds.

| Entry | Cyp1A2 | Cyp2C19 | Cyp2D6 | Cyp3A4 |
|-------|--------|---------|--------|--------|
| 1     | No     | No      | No     | No     |
| 2     | No     | No      | No     | No     |
| 3     | No     | No      | No     | Yes    |
| 4     | No     | No      | No     | No     |
| 5     | No     | No      | No     | No     |
| 6     | No     | No      | No     | Yes    |
| 7     | No     | No      | No     | Yes    |

**Table S4.** Prediction *in silico* of the toxicity of (MDGP, 1) compounds.

| Entry    | Ames toxicity | T. Pyriformis | Herg1 inhibition | LD50  | Skin sensitisation |
|----------|---------------|---------------|------------------|-------|--------------------|
| Toxicity |               |               |                  |       |                    |
| 1        | No            | 0.184         | No               | 2.533 | No                 |
| 2        | No            | 0.365         | No               | 2.046 | No                 |
| 3        | No            | 0.278         | No               | 2.185 | No                 |
| 4        | No            | 0.278         | No               | 2.185 | No                 |
| 5        | No            | 0.158         | No               | 2.308 | No                 |
| 6        | No            | 0.107         | No               | 2.291 | No                 |
| 7        | No            | 0.126         | No               | 2.317 | No                 |

**Table S5.** Name of the pathogenic microorganisms.

| Types of organisms     | Strain                        | Reference   |
|------------------------|-------------------------------|-------------|
| Gram-positive bacteria | <i>Bacillus subtilis</i>      | ATCC 6633   |
|                        | <i>Bacillus cereus</i>        | BTCC 19     |
| Gram-negative bacteria | <i>Escherichia coli</i>       | ATCC 8739   |
|                        | <i>Salmonella typhi</i>       | AE 14612    |
|                        | <i>Pseudomonas aeruginosa</i> | ATCC 9027   |
| Name of the fungi      | <i>Aspergillus niger</i>      | ATCC 16404  |
|                        | <i>Aspergillus flavus</i>     | ATCC 204304 |
